# Supplementary material
Source: PubMed Central journal article supplement (PMC10257814)
Supplement: NIHMS1889751-supplement-Supplemental_Material.pdf [file NIHMS1889751-supplement-Supplemental_Material.pdf]

## Supplemental Material

# **MRI of mouse cerebral cavernomas reveal differential lesion progression and variable permeability to gadolinium**

**Delaney G. Fisher<sup>1,#</sup>, Khadijeh A. Sharifi<sup>2,3,#</sup>, E. Zeynep Ulutas<sup>4</sup>, Jeyan S. Kumar<sup>3</sup>, M. Yashar S. Kalani<sup>5</sup>, G. Wilson Miller<sup>1,6</sup>, Richard J. Price<sup>1</sup>, Petr Tvrdik<sup>2,3</sup>**

1. Department of Biomedical Engineering, University of Virginia, Charlottesville, VA
2. Department of Neuroscience, University of Virginia, Charlottesville, VA
3. Department of Neurosurgery, University of Virginia Health System, Charlottesville, VA
4. Department of Neuroscience, Georgia Institute of Technology, Atlanta, GA
5. St. John's Neuroscience Institute, Tulsa, OK
6. Department of Radiology & Medical Imaging, University of Virginia, Charlottesville, VA

<sup>#</sup>Authors contributed equally

Correspondence:

Petr Tvrdik, Ph.D.  
409 Lane Road, MR-4, Room 1011,  
Charlottesville, VA 22908.  
Phone: 434-924-1956  
Email: tvrdik@virginia.edu

**Figure S1**

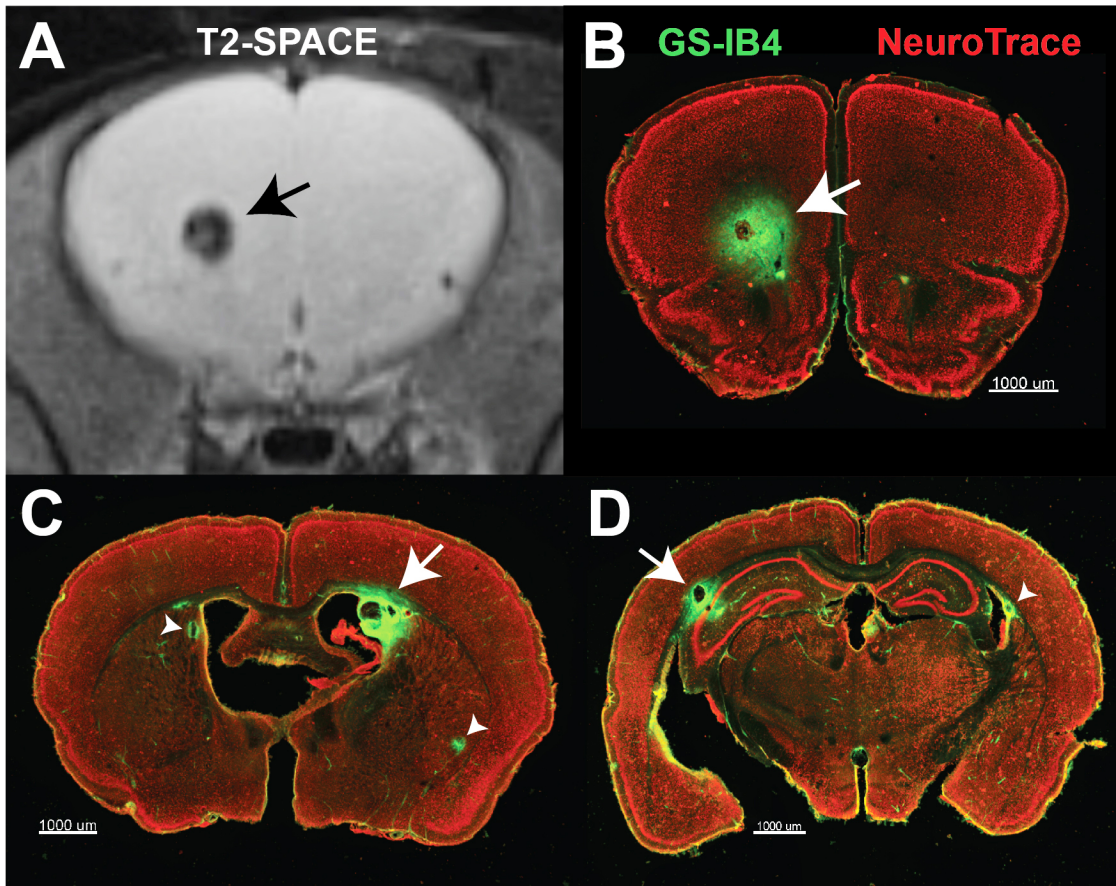

**Figure S1.** The anatomical distribution of vascular lesions in the *Krit1* CCM model. **A-B**, Alignment of a T2-SPACE MRI image plane with the corresponding brain section labeled with fluorescent isolectin GS-IB4 (green) and Neuro-Trace Nissl stain (red; n=1). **C**, In this mouse model, cavernous lesions frequently occur in dorsal striatum near lateral ventricles (white arrow). **D**, CCM lesions are also commonly found in the subcortical white matter of the corpus callosum, often adjacent to the dorsal hippocampus. (white arrow, arrow head). This Figure S1 is related to Figure 1.

Figure S2

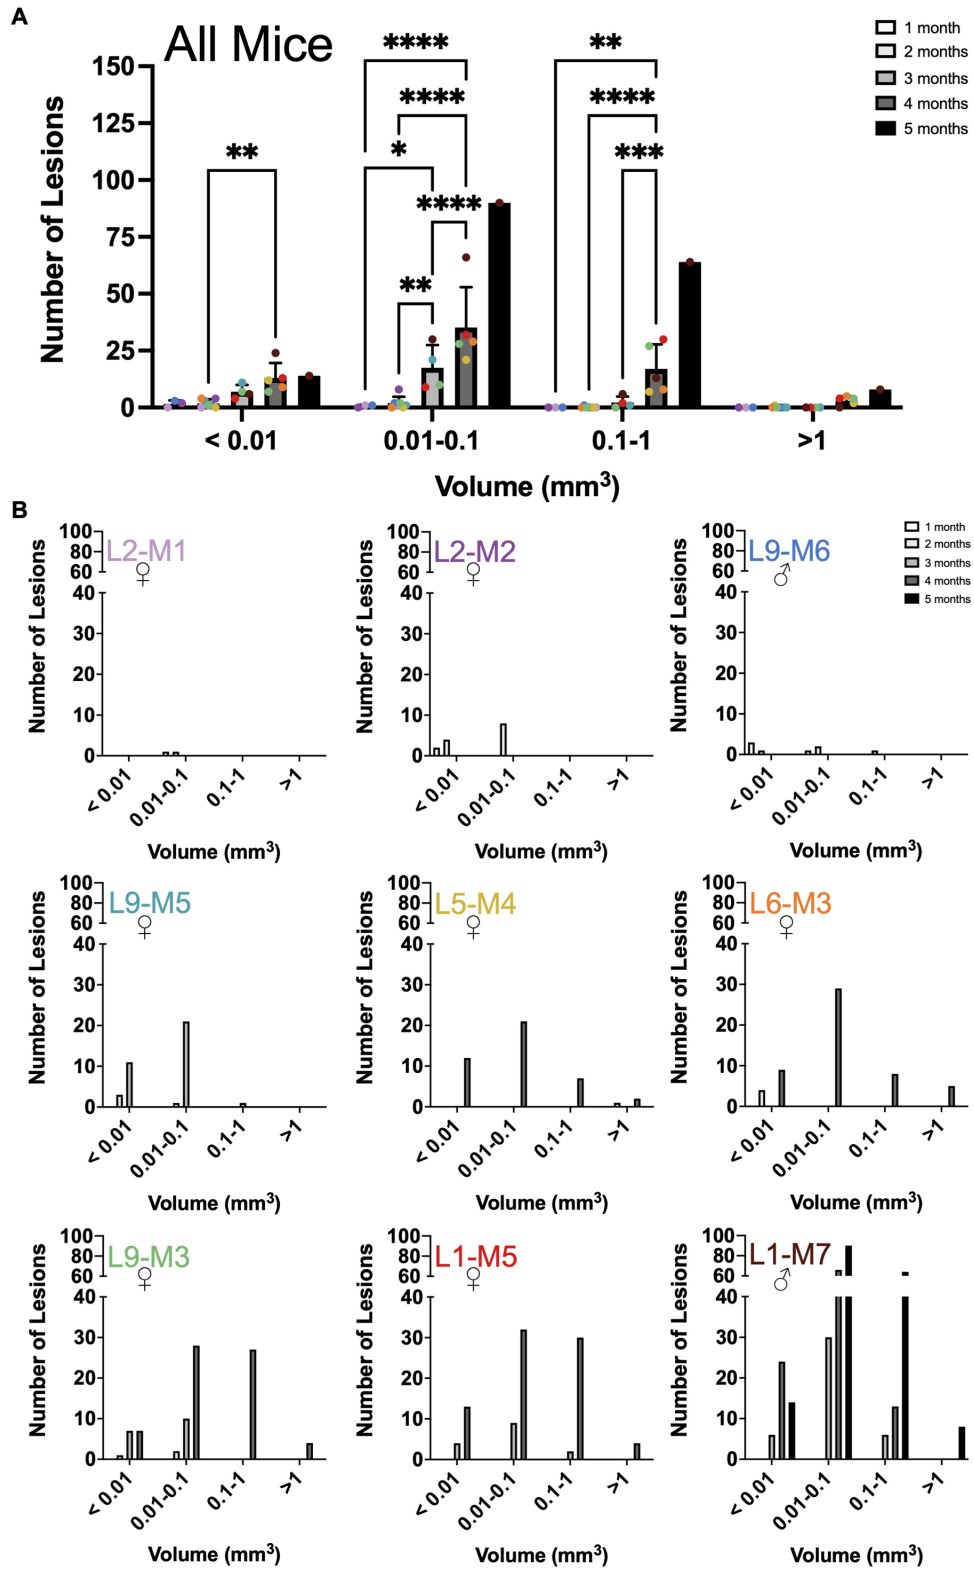

Figure S2. Number of small, intermediate, and large cerebral lesions at different age points in the *Krit1* CCM model. A, Lesion sizes were binned into 4 size groups V1-V4 (V1<0.01  $\text{mm}^3$ ;

## Figure S2

$0.01 \text{ mm}^3 \leq V2 < 0.1 \text{ mm}^3$ ;  $0.1 \text{ mm}^3 \leq V3 < 1 \text{ mm}^3$ ; and  $V4 \geq 1 \text{ mm}^3$ ). The number of lesions in each size group is plotted for each age point in the cohort (19 measurements in 9 mice). **B**, Total number of lesions in each size bin and imaging time point is plotted for every animal individually. Graph titles indicate unique mouse ID where L# denotes litter number and M# denotes arbitrary mouse number within litter. Sex of mice is indicated with the symbol ♀ for females (n=7) and ♂ for males (n=2). \*,  $p \leq 0.05$ ; \*\*,  $p \leq 0.01$ ; \*\*\*,  $p \leq 0.001$ ; \*\*\*\*,  $p \leq 0.0001$ ; mixed-effects model with repeated measures and Tukey's multiple comparisons test on datasets with  $n \geq 3$ . This Figure S2 is related to Figure 2.

Figure S3

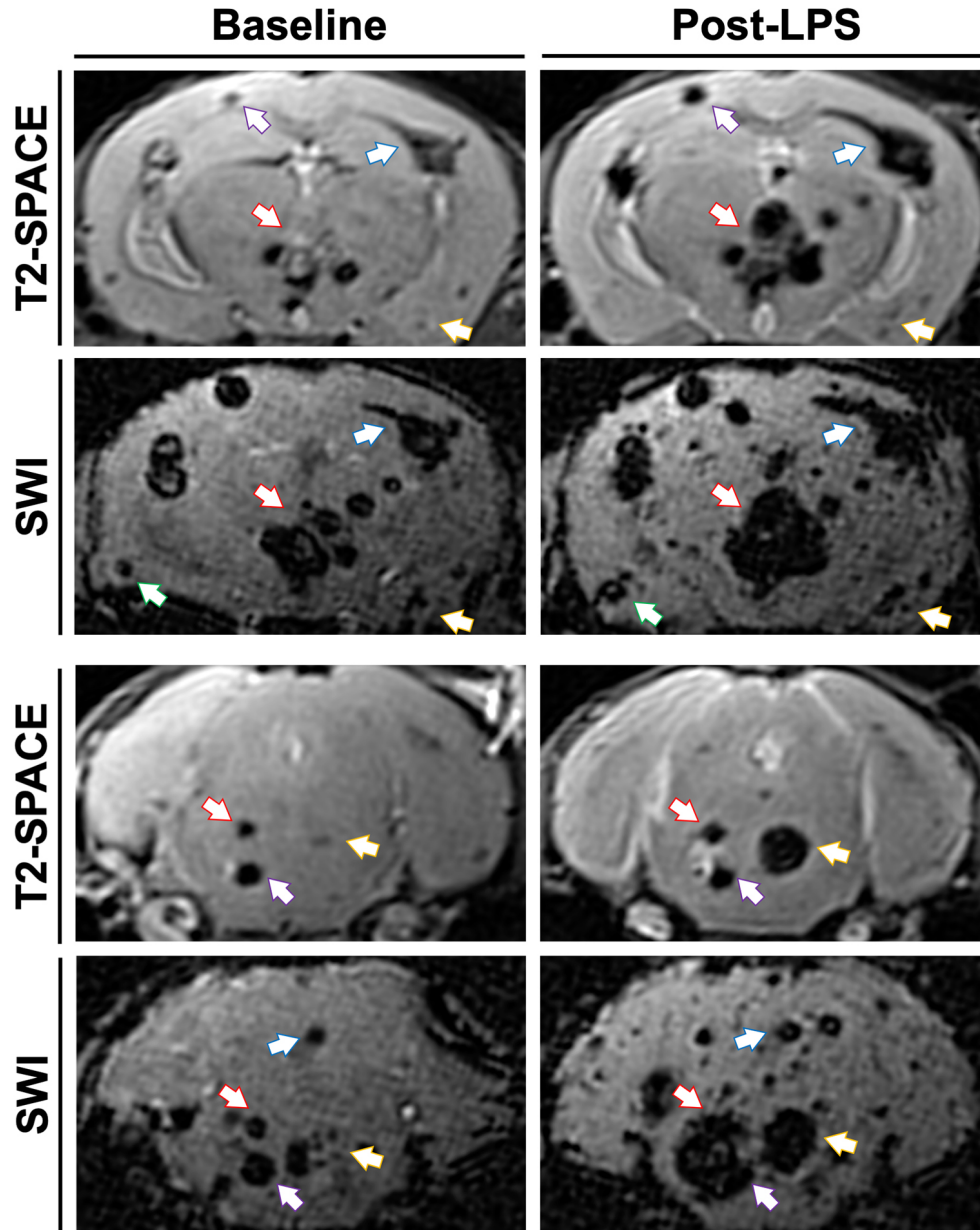

**Figure S3. Comparison of T2-SPACE and SWI sequence sensitivity before and after a sudden hemorrhagic episode.** The *Pdgfb-CreERT; Krit1<sup>fl/null</sup>* mouse (n=1) was imaged at Baseline and 12 h after acute mild neuroinflammation induced with LPS (0.25 mg/kg i.p.). Matching coronal planes of T2-SPACE and SWI are shown, demonstrating increased SWI sensitivity to CCM lesions. However, the exaggerated distortion of the lesion size is also apparent. Note the substantial increase in lesion volumes following neuroinflammation, accelerated due to fatal bleeding. Arrows identify the corresponding lesions between MRI sequences and inflammatory states.

Figure S4

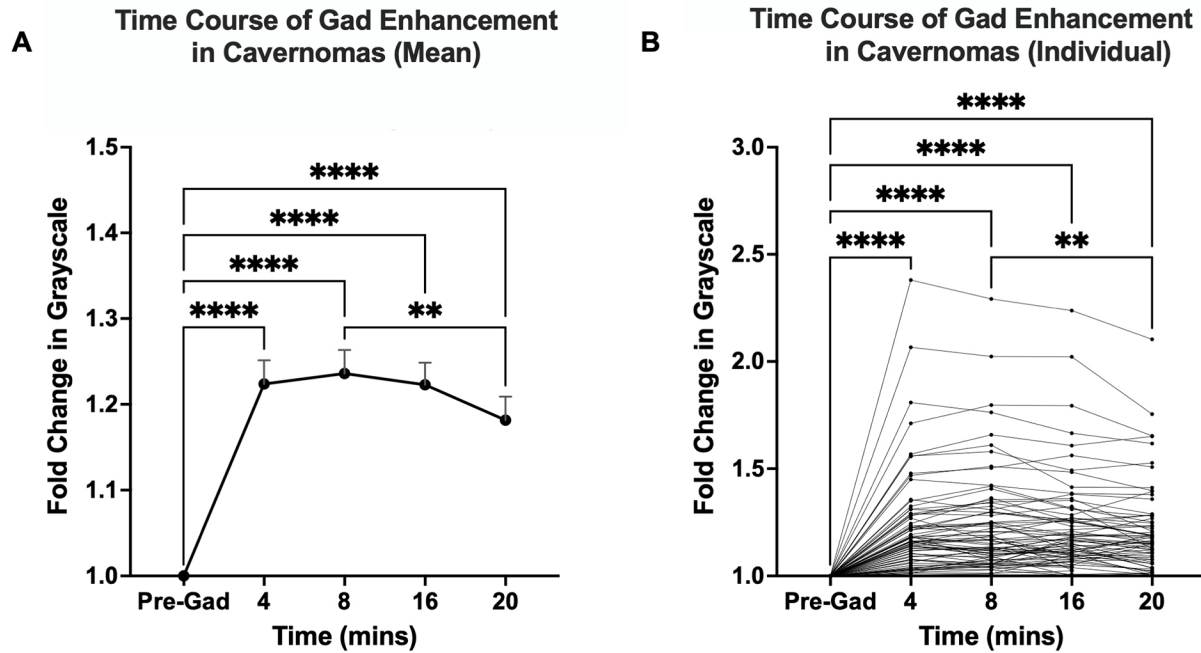

**Figure S4. Time course of T1 gadolinium-contrast enhancement within cavernomas in the L1-M7 animal (n=1).** A-B, Line graphs displaying fold change in grayscale intensity of 74 cavernomas at various times following gadolinium intravenous injection over pre-gadolinium T1-weighted image. **A**, Average fold change in grayscale intensity value for the 74 cavernomas. **B**, Individual fold change in grayscale intensity values for the 74 cavernomas. T1 contrast enhancement significantly increased from the pre-gadolinium image to 4 minutes post injection and significantly decreased at 20 minutes post injection. No statistically significant differences were found between the measurements obtained at 4 mins, 8 mins, or 16 mins post injection. \*\*,  $p \leq 0.01$ ; \*\*\*\*,  $p \leq 0.0001$ ; One-way repeated measures ANOVA with Tukey's multiple comparisons test. This Figure S4 is related to Figure 3.

Figure S5

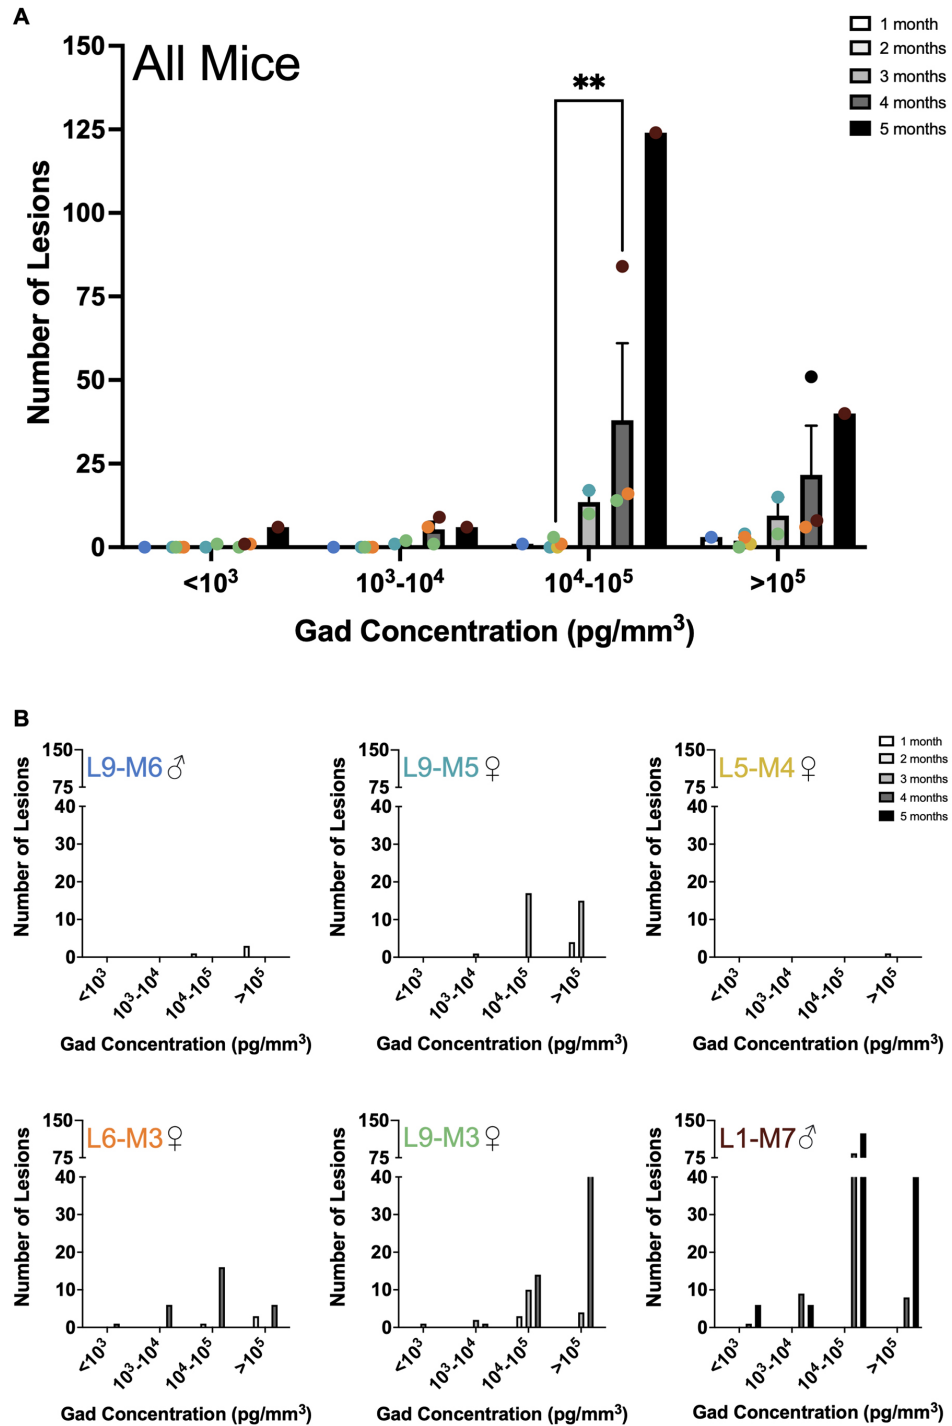

**Figure S5. Number of lesions with low, medium, and high permeability at different age points in the *Krit1* CCM model.** **A**, The lesions were binned by four gadolinium concentration levels G1-G4 (G1<10<sup>3</sup> pg/mm<sup>3</sup>; 10<sup>3</sup> pg/mm<sup>3</sup>≤G2<10<sup>4</sup> pg/mm<sup>3</sup>; 10<sup>4</sup> pg/mm<sup>3</sup>≤G3<10<sup>5</sup> pg/mm<sup>3</sup>; and G4≥10<sup>5</sup> pg/mm<sup>3</sup>). The number of lesions in each permeability bin and each age-point is plotted for the whole cohort (11 measurements in 6 mice). **B**, Total number of lesions for each gadolinium concentration range and imaging time point is plotted for each animal individually. Graph titles

## Figure S5

indicate unique mouse ID where L# denotes litter number and M# denotes arbitrary mouse number within litter. Sex of mice is indicated with the symbol ♀ for females (n=4) and ♂ for males (n=2). \*\*,  $p \leq 0.01$ ; mixed-effects model with repeated measures and Tukey's multiple comparisons test on datasets with  $n \geq 3$ . This Figure S5 is related to Figure 3.



Figure S6

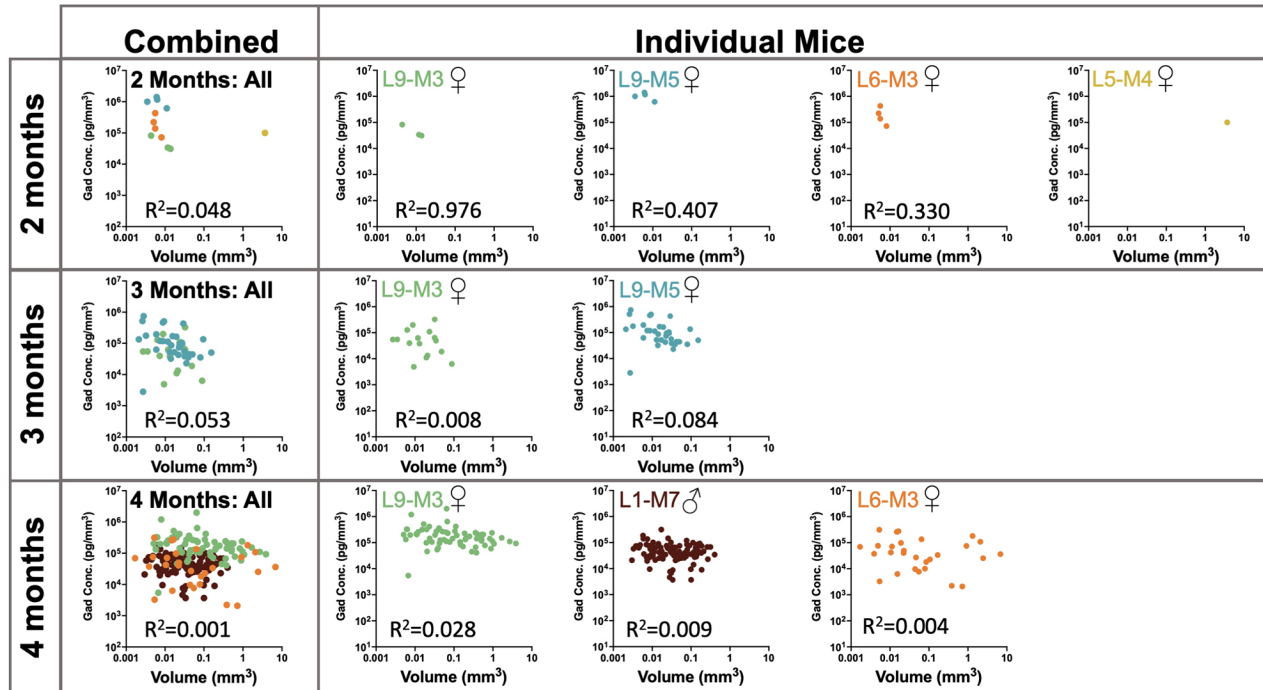

**Figure S6. Lesion permeability is poorly correlated with lesion volume.** Log-log graphs of gadolinium concentration as a function of lesion volume for individual lesions at each imaging time point. Data for all mice (n=5) at 2 months, 3 months, and 4 months is shown on the left. Data for individual mice and corresponding coefficients of determination values are disaggregated on the right. The coefficients of determination ( $R^2$ ) indicate poor correlation between gadolinium concentration and volume at all time points, suggesting highly heterogeneous permeability of lesions across age in this CCM model. Sex of mice is indicated with the symbol ♀ for females (n=4) and ♂ for males (n=1).

Figure S7

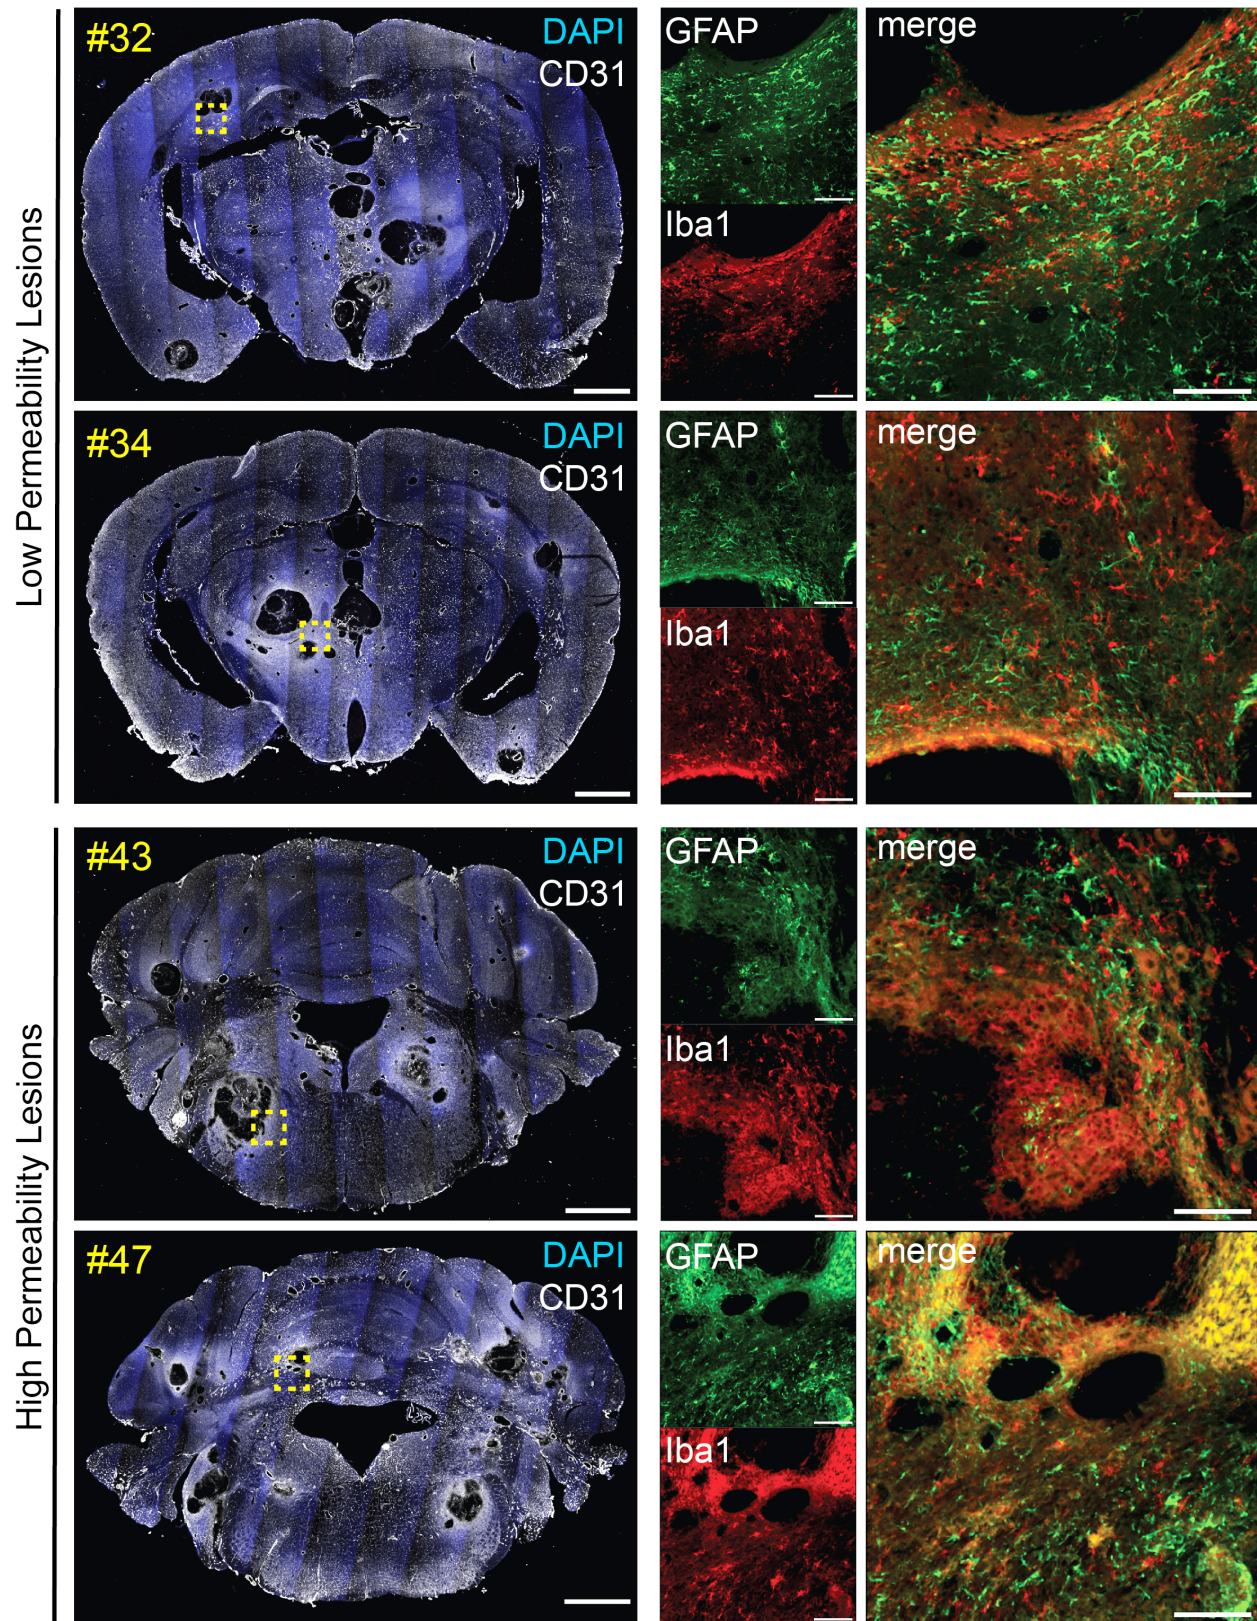

Figure S7. Anatomical and cellular context of CCM lesions with low and high permeability in L9-M3 (n=1). On the left: Tiled confocal images of brain coronal sections harboring the lesions

## Figure S7

with the lowest permeability (#32 in the subcortical corpus callosum and #34 in the thalamus, see Supplemental Table S3 for an overview of measurements) are shown on top. Two lesions with the highest permeability (#43 in the brainstem and #47 in the cerebellum, see Supplemental Table 1 for detail) are shown at the bottom. The tiled coronal sections, scanned at a low resolution, show the overlay of nuclear stain DAPI (blue) and CD31 endothelial cell marker (white). The area marked with the yellow dashed box in each coronal section was imaged at a higher resolution, and the corresponding images of GFAP-positive astrocytes (green) and Iba1-positive microglia/macrophages (red), as well as the merged overlay, are shown on the right. The lesions with a high gadolinium content appear to have fewer glial cells in the immediate vicinity of the borders. Scale bars: tiled coronal section images, 1 mm; high-resolution IHC panels, 100  $\mu\text{m}$ . This Figure S7 is related to Figure 5.

Figure S8

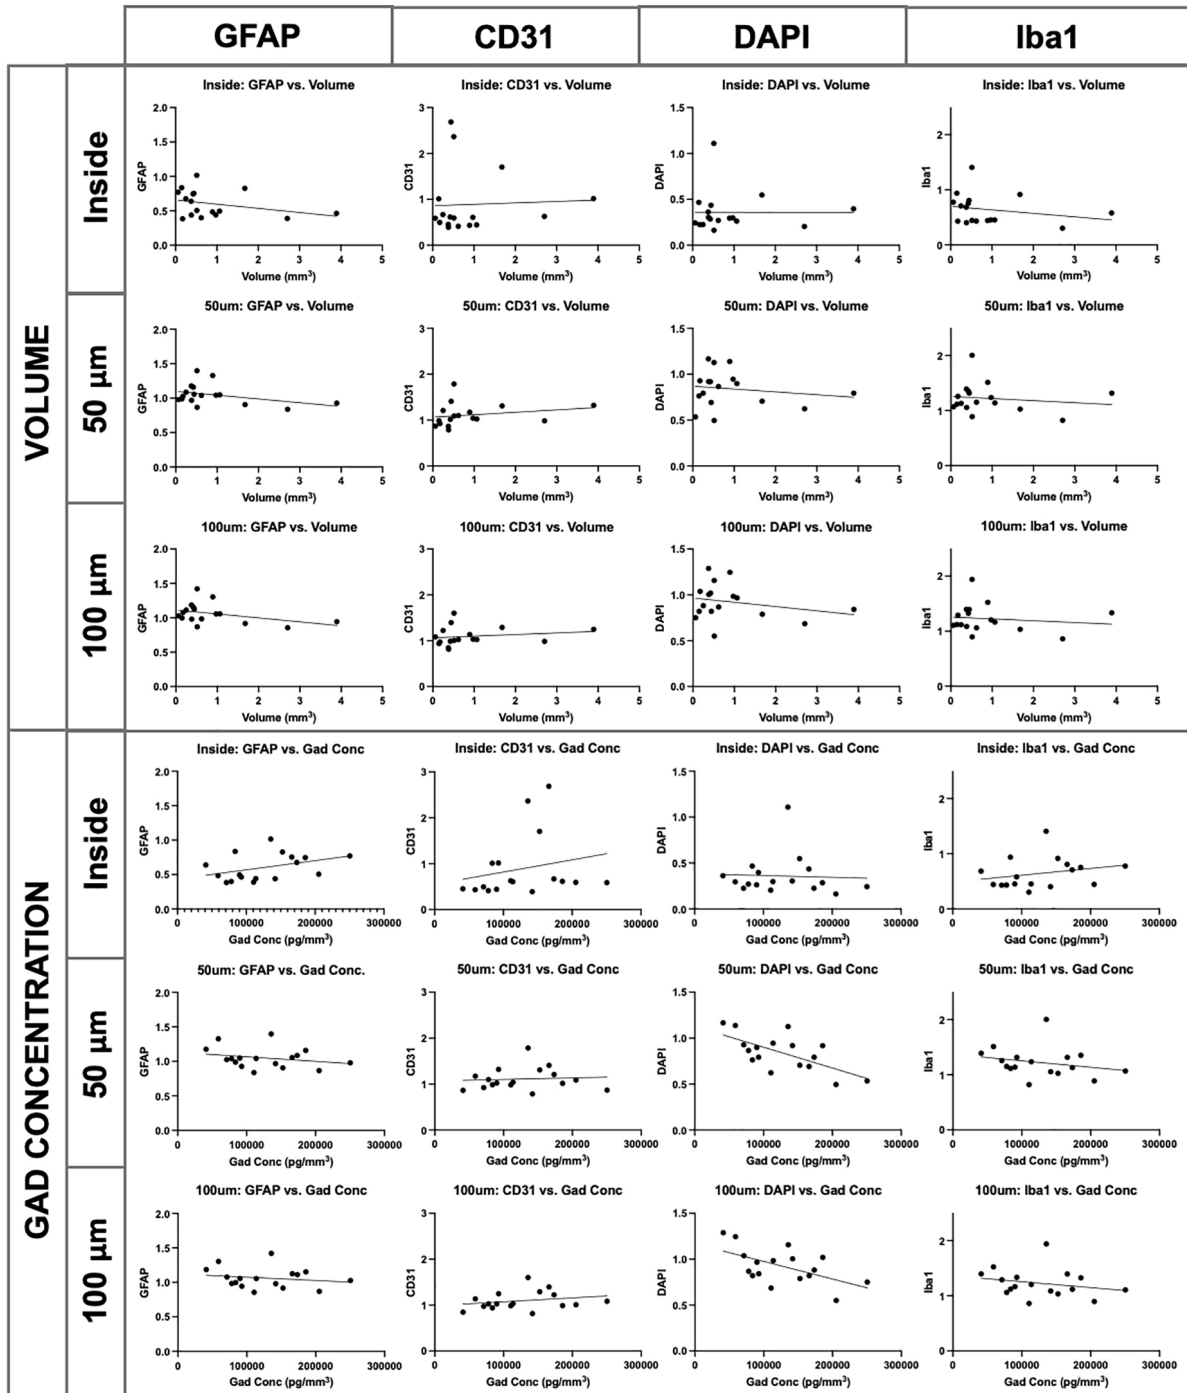

Figure S8. Correlations between MR signatures and IHC signatures in L9-M3 (n=1). Correlation plots for individual cell populations (astrocytes-GFAP, endothelial cells-CD31, cell nuclei-DAPI, and microglia-Iba1) and MR features (lesion volume and lesion permeability) at different locations around the lesion (inside lesion, 50µm border outside lesion, and 100µm border outside lesion). Dots indicate the 17 individual lesions. Linear regression fitted to each dataset.

**Figure S9**

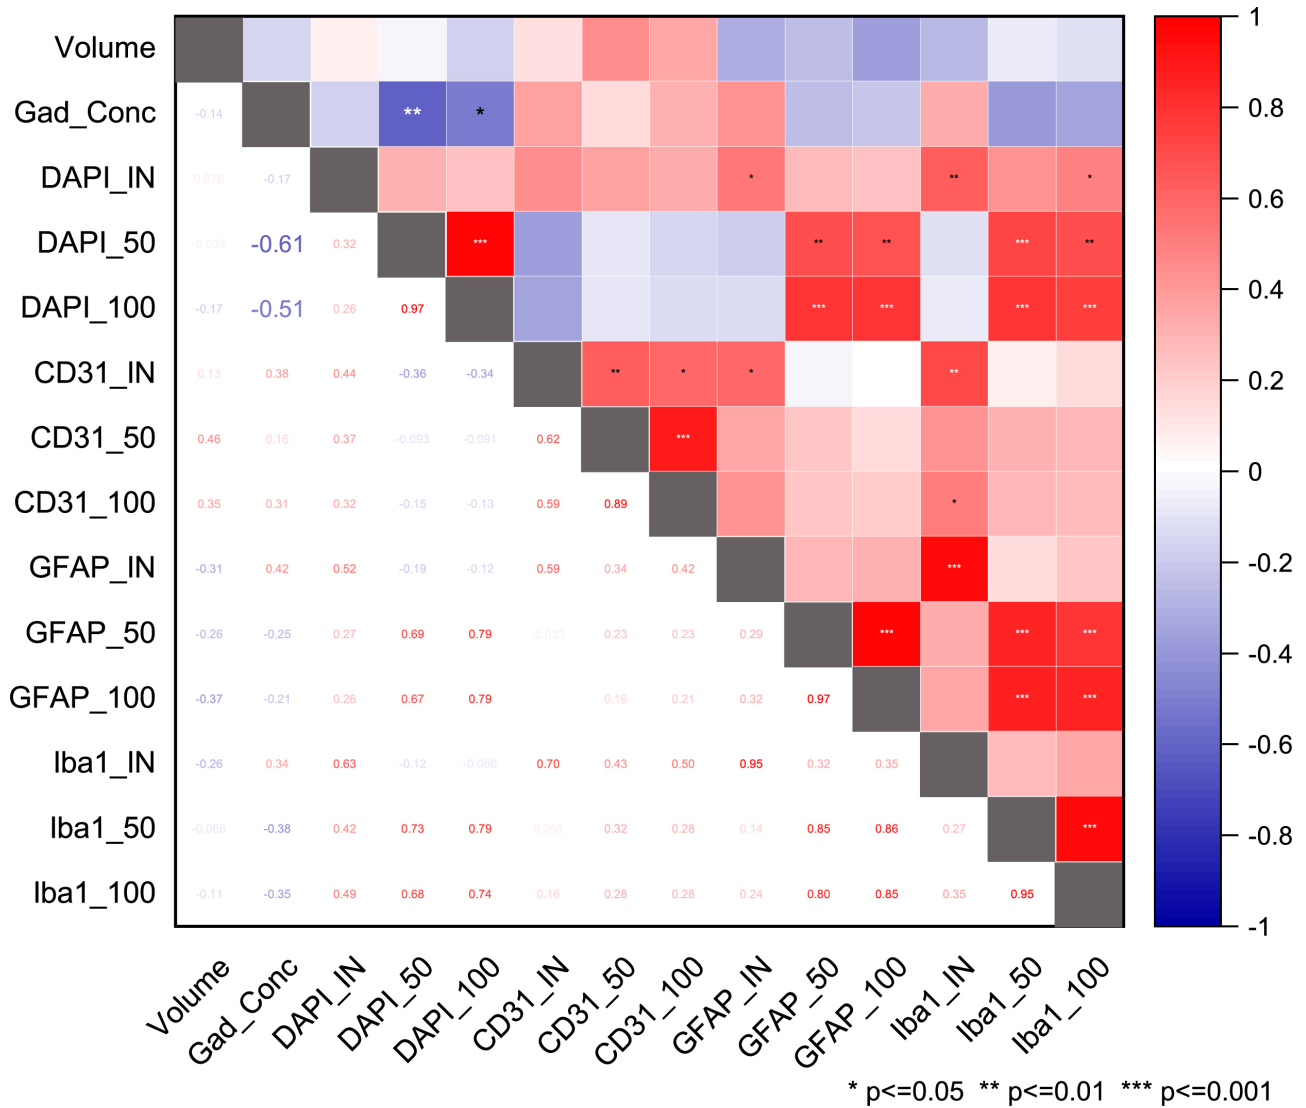

**Figure S9. Correlation Matrix Heatplot of 14 variables in 17 different CCM lesions in the L9-M3 animal (n=1).** Two variables, Volume and Gad Concentration, were measured with MRI, the values of the remaining 12 variables were obtained with confocal image analysis of brain sections stained with IHC inside the lesions, as well as in 50- and 100- $\mu$ m perimeters outside the lesions. Significant inverse correlations between MRI and IHC were found for gadolinium concentration and DAPI intensity for both 50- $\mu$ m and 100- $\mu$ m border perimeters ( $r = -0.61$ ,  $p = 0.009$ ; and  $r = -0.51$ ,  $p = 0.036$ ; respectively). The plot was generated with OriginPro 2020.

Figure S10

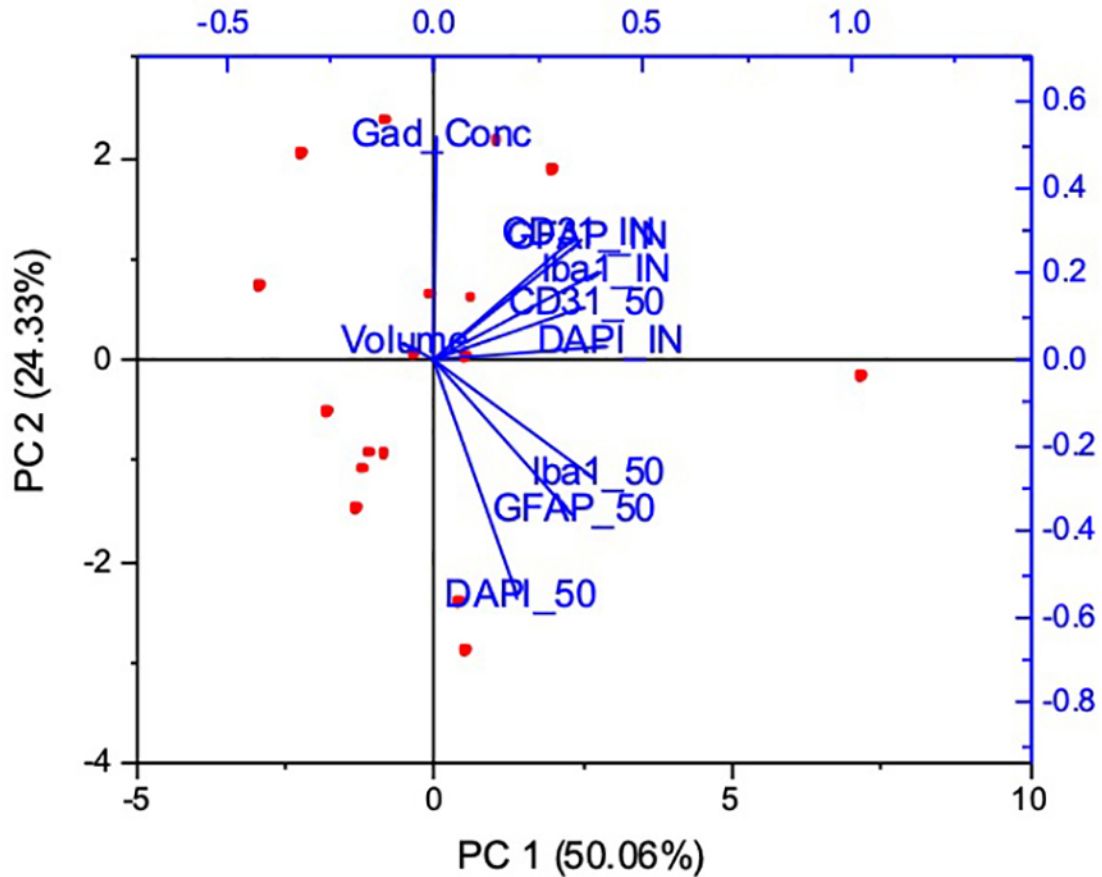

**Figure S10. Principal component analysis (PCA) of 10 variables in 17 different CCM lesions in the L9-M3 animal (n=1).** The plot includes volume and gadolinium concentration (Gad\_Conc), as well as the IHC values inside the lesions (DAPI, GFAP, Iba1, CD31). Only the 50- $\mu$ m perimeters were included in this analysis for the sake of clarity. PCA analysis corroborates the inverse correlation of gadolinium concentration and DAPI intensity outside the lesions, and reveals trends towards inverse correlation between gadolinium concentration and Iba1 and GFAP fluorescence intensity outside the lesions. The plot was generated with OriginPro 2020.

## **Legends for Supplemental Videos**

### **Video S1**

Longitudinal T2-SPACE MR images demonstrate an increase in lesion load with age. Movie of T2-SPACE images of mouse L1-M7 from timepoints of 3 months, 4 months, and 5 months of age. Lesions are denoted with manually drawn ROIs in each MR slice. Lesion burden is seen to increase with age.

### **Video S2**

MR images of T2-SPACE and gadolinium concentration maps indicated variability of individual lesion permeability. Animations include T2-SPACE MR images, gadolinium concentration maps, and merged images of mouse L1-M7 at 5 months of age.

### **Video S3**

Longitudinal MR images of merged T2-SPACE and gadolinium concentration maps indicate an increase in cumulative lesion permeability with age. Movies consist of merged T2-SPACE images and gadolinium concentration maps of mouse L1-M7 from timepoints of 4 months and 5 months of age. Overall lesion permeability is seen to increase with age.

## Supplemental Tables

**Table S1.** Random coefficient regression analysis of total lesion volumes in Figure 2B

Table S1a. Summary statistics for Total Lesion Volume (mm<sup>3</sup>), stratified by mouse age.

| Month | n | Mean  | Standard Deviation | Standard Error | Geom. Mean | Median | Interquartile Range |       | Minimum | Maximum |
|-------|---|-------|--------------------|----------------|------------|--------|---------------------|-------|---------|---------|
| 1     | 3 | 0.03  | 0.02               | 0.01           | 0.03       | 0.04   | 0.03                | 0.04  | 0.02    | 0.05    |
| 2     | 7 | 0.62  | 1.35               | 0.51           | 0.11       | 0.04   | 0.03                | 0.28  | 0.02    | 3.68    |
| 3     | 4 | 0.95  | 0.73               | 0.37           | 0.78       | 0.71   | 0.51                | 1.15  | 0.37    | 2.01    |
| 4     | 5 | 28.56 | 30.04              | 13.43          | 19.78      | 18.49  | 15.45               | 21.52 | 6.07    | 81.29   |
| 5     | 1 | 46.72 |                    |                | 46.72      | 46.72  | 46.72               | 46.72 | 46.72   | 46.72   |

Table S1b. Intercept and slope coefficients for the random coefficient regression of log<sub>10</sub>(Total Lesion Volume [mm<sup>3</sup>]) onto mouse age.

| Parameter | Estimate | Standard Error | Lower 95% CL | Upper 95% CL | t-statistics | P-value |
|-----------|----------|----------------|--------------|--------------|--------------|---------|
| Intercept | -2.790   | 0.335          | -3.496       | -2.084       |              |         |
| Slope     | 0.976    | 0.111          | 0.742        | 1.211        | 8.762        | <0.001  |

Logarithmic base 10 Scale - Marginal Random Coefficient Regression Equation:

$$E(\log_{10}(\text{Total Lesion Volume [mm}^3\text{)]}|\text{Age}) = -2.790 + 0.976 \times \text{age.}$$

Original Scale - Marginal Random Coefficient Regression Equation:

$$E(\text{Total Lesion Volume [mm}^3\text{)]}|\text{Age}) = 0.0016 \times 10^{[0.976 \times \text{Age}]}$$

**Table S2.** Random coefficient regression analysis of total gadolinium permeability in Figure 3B

Table S2a. Summary statistics for Total Lesion Gad Mass (pg), stratified by mouse age.

| Month | n | Mean     | Standard Deviation | Standard Error | Geom. Mean | Median   | Interquartile Range |          | Minimum  | Maximum  |
|-------|---|----------|--------------------|----------------|------------|----------|---------------------|----------|----------|----------|
| 1     | 1 | 475654   |                    |                | 475654     | 475654   | 475654              | 475654   | 475654   | 475654   |
| 2     | 4 | 1323047  | 1938784            | 969392         | 479920     | 504084   | 135385              | 1691746  | 100068   | 4183952  |
| 3     | 2 | 3084525  | 2698345            | 1908018        | 2423584    | 3084525  | 2130516             | 4038534  | 1176507  | 4992543  |
| 4     | 3 | 7517977  | 6732847            | 3887211        | 5517069    | 5483267  | 3760215             | 10258380 | 2037163  | 15033500 |
| 5     | 1 | 12500000 |                    |                | 12500000   | 12500000 | 12500000            | 12500000 | 12500000 | 12500000 |

Table S2b. Intercept and slope coefficients for the random coefficient regression of log<sub>10</sub>(Total Lesion Gad Mass [pg]) onto mouse age.

| Parameter | Estimate | Standard Error | Lower 95% CL | Upper 95% CL | t-statistics | P-value |
|-----------|----------|----------------|--------------|--------------|--------------|---------|
| Intercept | 4.971    | 0.371          | 4.093        | 5.848        |              |         |
| Slope     | 0.398    | 0.089          | 0.180        | 0.617        | 4.488        | 0.004   |

Logarithmic base 10 Scale - Marginal Random Coefficient Regression Equation:

$$E(\log_{10}(\text{Total Lesion Volume [mm}^3\text{)]}|\text{Age}) = 4.971 + 0.398 \times \text{age.}$$

Original Scale - Marginal Random Coefficient Regression Equation:

$$E(\text{Total Lesion Gad Mass [pg]}|\text{Age}) = 93510.57 \times 10^{[0.398 \times \text{Age}]}$$



**Table S3.** MRI and IHC data on 17 lesions obtained from animal L9-M3.

| Lesion | Gad Conc (pg/mm <sup>3</sup> ) | Volume (mm <sup>3</sup> ) | Inside Mean (Reps Avg) |             |             |             | 100um Mean (Reps Avg) |            |            |             | 50um Mean (Reps Avg) |            |            |            |
|--------|--------------------------------|---------------------------|------------------------|-------------|-------------|-------------|-----------------------|------------|------------|-------------|----------------------|------------|------------|------------|
|        |                                |                           | GFAP_inside            | CD31_inside | DAPI_inside | Iba1_inside | GFAP_100um            | CD31_100um | DAPI_100um | Iba1_100um  | GFAP_50um            | CD31_50um  | DAPI_50um  | Iba1_50um  |
| 12     | 92714.5788                     | 3.8942                    | 0.46431863             | 1.01534338  | 0.39739129  | 0.58003318  | 0.94344428            | 1.24834218 | 0.84130118 | 1.33337894  | 0.92819999           | 1.32170925 | 0.79301331 | 1.31549563 |
| 16     | 113740.0996                    | 0.9725                    | 0.44099493             | 0.60750498  | 0.29784429  | 0.45337761  | 1.05657798            | 1.03322419 | 0.98448816 | 1.2047426   | 1.04330989           | 1.04137755 | 0.94552601 | 1.2354617  |
| 17     | 110661.7079                    | 2.7031                    | 0.38937866             | 0.62818661  | 0.2048617   | 0.30379374  | 0.8551767             | 0.98707081 | 0.68545834 | 0.86080886  | 0.83671356           | 0.98295539 | 0.62263874 | 0.82109026 |
| 18     | 152649.9725                    | 1.6776                    | 0.82669582             | 1.70259179  | 0.54788267  | 0.91609303  | 0.91692457            | 1.29233802 | 0.78997916 | 1.03453302  | 0.90555817           | 1.30880106 | 0.70567011 | 1.02616352 |
| 19     | 135598.183                     | 0.5125                    | 1.01641016             | 2.36726778  | 1.10923653  | 1.40645212  | 1.4206322             | 1.60233765 | 1.15720102 | 1.93994806  | 1.39806536           | 1.78651591 | 1.12710486 | 2.00208622 |
| 20     | 90145.63991                    | 1.0659                    | 0.49600156             | 0.44496801  | 0.26312907  | 0.45317014  | 1.05704584            | 1.02678042 | 0.96732064 | 1.16566499  | 1.04721102           | 1.0239466  | 0.89858737 | 1.13835663 |
| 30     | 78085.07867                    | 0.6213                    | 0.39885241             | 0.41496721  | 0.27075706  | 0.43231426  | 0.98397994            | 1.02685786 | 0.86826289 | 1.06163354  | 1.03980435           | 1.09825813 | 0.86581851 | 1.1515327  |
| 31     | 71134.76341                    | 0.1706                    | 0.38462935             | 0.49633306  | 0.22619912  | 0.43015429  | 1.07708834            | 0.9729577  | 1.03793697 | 1.29016273  | 1.02532204           | 0.92479411 | 0.92802168 | 1.25638964 |
| 32     | 41019.87042                    | 0.3754                    | 0.6389012              | 0.45388075  | 0.36212609  | 0.68347586  | 1.18503577            | 0.84585389 | 1.28792896 | 1.39640469  | 1.17517655           | 0.86468505 | 1.16644144 | 1.3908819  |
| 33     | 141878.8492                    | 0.3832                    | 0.43839389             | 0.39165771  | 0.30476375  | 0.40286051  | 0.98028225            | 0.81571769 | 1.00408845 | 1.08561283  | 0.96757882           | 0.78639576 | 0.91928778 | 1.05418382 |
| 34     | 58894.88952                    | 0.894                     | 0.48341992             | 0.43373104  | 0.29580202  | 0.44306105  | 1.30477273            | 1.1364358  | 1.24621049 | 1.52406022  | 1.32721962           | 1.1706922  | 1.13792745 | 1.51234684 |
| 43     | 185812.8089                    | 0.424                     | 0.74515852             | 0.61632318  | 0.2855843   | 0.75269869  | 1.15277551            | 0.98880473 | 1.01938653 | 1.32610403  | 1.15967395           | 1.01563284 | 0.91807499 | 1.3538739  |
| 44     | 166056.7799                    | 0.442                     | 0.75415504             | 2.68520111  | 0.43552906  | 0.80703634  | 1.12553339            | 1.39724704 | 0.82082223 | 1.39513438  | 1.05623473           | 1.40830901 | 0.69221363 | 1.31614934 |
| 45     | 83752.36809                    | 0.1478                    | 0.83629065             | 1.01151024  | 0.46652356  | 0.93781281  | 0.99701947            | 0.93919582 | 0.82031542 | 1.12239723  | 0.98945611           | 0.98743172 | 0.76259297 | 1.11489603 |
| 46     | 205300.9457                    | 0.5158                    | 0.50572214             | 0.5932727   | 0.16259457  | 0.44456393  | 0.86956832            | 1.00766763 | 0.55031929 | 0.89620943  | 0.86603              | 1.08794183 | 0.49567473 | 0.88856042 |
| 47     | 250453.6696                    | 0.0632                    | 0.77136785             | 0.58877769  | 0.24307874  | 0.77660994  | 1.02736035            | 1.08461039 | 0.75109719 | 1.10625199  | 0.97977754           | 0.86874446 | 0.53468568 | 1.06765946 |
| 50     | 173442.2976                    | 0.2495                    | 0.67587646             | 0.6675078   | 0.22576538  | 0.70773858  | 1.11266199            | 1.22339701 | 0.88156548 | 1.111725933 | 1.08566037           | 1.20825458 | 0.79274544 | 1.12942283 |

## Major Resources Table

### Animals (in vivo studies)

| Species | Vendor or Source       | Background Strain | Sex  | Persistent ID / URL                     |
|---------|------------------------|-------------------|------|-----------------------------------------|
| Mice    | The Jackson Laboratory | C57BL/6J          | both | Strain #:000664<br>RRID:IMSR_JAX:000664 |

### Genetically Modified Animals

|                                 | Species | Vendor or Source                            | Background Strain | Persistent ID / URL    |
|---------------------------------|---------|---------------------------------------------|-------------------|------------------------|
| <i>Pdgfb-iCreERT2-IRES-EGFP</i> | Mice    | Dr. Kevin Whitehead lab, University of Utah | C57BL/6J; 129/Sv  | DOI: 10.1002/dvg.20367 |
| <i>Krit1 flox/null</i>          | Mice    | Dr. Kevin Whitehead lab, University of Utah | C57BL/6J; 129/Sv  | DOI: 10.1002/dvg.20367 |

### Antibodies

| Target antigen                | Vendor or Source        | Catalog #   | Working conc. | Persistent ID / URL |
|-------------------------------|-------------------------|-------------|---------------|---------------------|
| Chicken anti-GFAP             | Aves Labs               | GFAP        | (1:200)       | RRID: AB_2313547    |
| Rabbit anti-Iba1              | Wako Chemicals USA      | 016-20001   | (1:500)       | RRID:AB_839506      |
| Goat anti-CD31                | R&D Systems             | AF3628      | (1:20)        | RRID:AB_2161028     |
| Donkey anti-chicken Alexa 488 | Jackson ImmunoRes. Labs | 703-546-155 | (1:500)       | RRID:AB_2340376     |
| Donkey anti-rabbit Alexa 568  | Invitrogen              | A10042      | (1:500)       | RRID:AB_2534017     |
| Donkey anti-goat Alexa 647    | Invitrogen              | A21447      | (1:500)       | RRID:AB_2535864     |

### Data & Code Availability

| Description     | Source / Repository | Persistent ID / URL                                                                         |
|-----------------|---------------------|---------------------------------------------------------------------------------------------|
| MRI DICOM files | UVA Libra           | <a href="https://www.library.virginia.edu/libra">https://www.library.virginia.edu/libra</a> |

### Other

| Description                                                                                   | Source / Repository         | Persistent ID / URL                |
|-----------------------------------------------------------------------------------------------|-----------------------------|------------------------------------|
| NeuroTrace™ 530/615 Red Fluorescent Nissl Stain                                               | Invitrogen                  | N21482;<br>RRID: AB_2620170        |
| Isolectin GS-IB <sub>4</sub> From <i>Griffonia simplicifolia</i> , Alexa Fluor™ 488 Conjugate | Invitrogen                  | I21411;<br>RRID: AB_2314662        |
| Fluoromount-G                                                                                 | SouthernBiotech             | 0100-01                            |
| Fluoromount-G™ Mounting Medium, with DAPI                                                     | Invitrogen                  | Cat# 00-4959-52<br>Lot No. E141818 |
| DAPI                                                                                          | ThermoFisher                | D1306                              |
| PBS (Phosphate-Buffered Saline)                                                               | Sigma-Aldrich               | P4417-100 TAB                      |
| Sucrose                                                                                       | Sigma Millipore             | S1888-500G                         |
| 32% Paraformaldehyde aqueous solution                                                         | EMS                         | 50-980-495                         |
| Triton X-100                                                                                  | Sigma-Aldrich               | T8787-100 ml                       |
| Bovine serum albumin (BSA)                                                                    | Jackson ImmunoResearch Labs | 001-000-161;<br>RRID: AB_2336945   |
| Normal donkey serum (NDS)                                                                     | Jackson ImmunoResearch Labs | 017-000-121<br>RRID: AB_2337258    |
| Tissue-Tek O.C.T. Compound                                                                    | Andwin Scientific           | 4583                               |
| Secure Seal Spacers                                                                           | EMS                         | 70327-20S                          |
| Microscope slides                                                                             | FisherScientific            | 12-5550-15                         |
| Fisherbrand Microscope Cover Glass                                                            | FisherScientific            | 12544E                             |
| Corn oil                                                                                      | Sigma-Aldrich               | C8267-500 mL                       |

DOI [to be added]

|                                     |               |                          |
|-------------------------------------|---------------|--------------------------|
| Tamoxifen                           | Sigma-Aldrich | T5648-5G                 |
| lipo-polysaccharides (LPS)          | Sigma-Aldrich | L4391                    |
| Isoflurane                          | Dechra        | 17033-094-25             |
| MultiHance (gadobenate dimeglumine) | Bracco        | 0270-5164-15; 20mL vials |

## ARRIVE GUIDELINES

The ARRIVE guidelines (<https://arriveguidelines.org/>) are a checklist of recommendations to improve the reporting of research involving animals. Key elements of the study design should be included below to better enable readers to scrutinize the research adequately, evaluate its methodological rigor, and reproduce the methods or findings.

### Study Design

| Groups                                | Sex   | Age   | Number (prior to experiment) | Number (after termination) | Littermates (Yes/No) | Other description |
|---------------------------------------|-------|-------|------------------------------|----------------------------|----------------------|-------------------|
| <i>Pdgfb-CreERT2; Krit1 flox/null</i> | M & F | 1-5 m | 35                           | 9 (2M & 7F)                | yes                  | MRI, histology    |
| <i>Pdgfb-CreERT2; Krit1 flox/wt</i>   | M & F | 1-5 m | 4                            | 4 (2M & 2F)                | yes                  | neg. control      |
| <i>Krit1 flox/null</i>                | M & F | 1-5 m | 4                            | 4 (2M & 2F)                | yes                  | neg. control      |

**Sample Size:** The study was designed as an exploratory study and formal sample size calculation was not performed.

**Inclusion Criteria:** *Pdgfb-CreERT2; Krit1 flox/null* genotype, two or more MRI scans spaced by 1 month available

**Exclusion Criteria:** Stunted growth, lethargic behavior, hunched posture and visible skin wounds, unusually low body weight.

**Randomization:** Not applicable; mice were assigned to groups according to their genotype, sex and age

**Blinding:** Yes
